# Supplementary material for: A general class of shock models with dependent inter-arrival times
Source: Springer Nature journal article supplement (doi:10.1007/s11749-023-00867-w), 2023-05-28
Supplement: 11749_2023_867_MOESM1_ESM.pdf [file 11749_2023_867_MOESM1_ESM.pdf]

# Supplementary materials for “A general class of shock models with dependent inter-arrival times”

Dheeraj Goyal<sup>a</sup>, Nil Kamal Hazra<sup>a,b</sup>, and Maxim Finkelstein<sup>\*c,d</sup>

<sup>a</sup>Department of Mathematics, Indian Institute of Technology Jodhpur, 342037, Karwar, Rajasthan, India

<sup>b</sup>School of AI & DS, Indian Institute of Technology Jodhpur, 342037, Karwar, Rajasthan, India

<sup>c</sup>Department of Mathematical Statistics and Actuarial Science, University of the Free State, 339 Bloemfontein 9300, South Africa

<sup>d</sup>Department of Management Science, University of Strathclyde, Glasgow, UK.

**Proof of Lemma 3.3:** Let  $\epsilon = u + iv$ , where  $u > 0$  and  $i = \sqrt{-1}$ . Then

$$\begin{aligned}
 \int_0^\infty \exp\{-(\epsilon x + 1)q\}q^{n-1}dq &= \int_0^\infty q^{n-1} \exp\{-(1 + ux)q\} \exp\{-ivxq\}dq \\
 &= \frac{1}{(-2\pi i)^{n-1}} \mathcal{F}((-2\pi i q)^{n-1} \exp\{-(1 + ux)q\} I_0(q))(vx/2\pi) \\
 &= \frac{1}{(-2\pi i)^{n-1}} \frac{d^{n-1}}{ds^{n-1}} \mathcal{F}(\exp\{-(1 + ux)q\} I_0(q))(s) \Big|_{s=vx/2\pi} \\
 &= \frac{1}{(-2\pi i)^{n-1}} \frac{d^{n-1}}{ds^{n-1}} \left( \frac{1}{2\pi i s + (1 + ux)} \right) \Big|_{s=vx/2\pi} \\
 &= \Gamma(n) \left( \frac{1}{2\pi i s + (1 + ux)} \right)^n \Big|_{s=vx/2\pi} = \Gamma(n) \left( \frac{1}{ivx + (1 + ux)} \right)^n \\
 &= \Gamma(n) \left( \frac{1}{1 + \epsilon x} \right)^n,
 \end{aligned}$$

where the second equality follows from Definition 3.1 and Lemma 3.2 (ii); the third equality follows from Lemma 3.2 (iii), and the fourth equality follows from Lemma 3.2 (i). Moreover, the function  $I_0(\cdot)$  is the same as in Lemma 3.2 (i).  $\square$

**Proof of Theorem 3.1 (i):** Consider

$$\bar{F}_L(t) = P \left( \sum_{i=1}^M X_i > t \right) = \int_0^\infty P \left( \sum_{i=1}^M X_i > t | Q = q \right) f_Q(q) dq, \quad (\text{A1})$$

---

\*Corresponding author, email: FinkelM@ufs.ac.za

where  $Q$  is the mixing distribution of the HPGGP. Note that, for given  $Q = q$ , the HPGGP with the set of parameters  $\{\lambda, \nu, k, \alpha, l\}$  is the same as the HPP with intensity  $q\lambda$ . Then, from Lemma 3.1, we get

$$P\left(\sum_{i=1}^M X_i > t | Q = q\right) = \mathbf{a} \exp\{-q\lambda t(\mathbf{I} - \mathbf{A})\} \mathbf{e}. \quad (\text{A2})$$

By using (A2) and (2.1) in (A1), we get

$$\bar{F}_L(t) = \frac{\alpha^{k-\nu}}{\Gamma_\nu(k, \alpha l)} \int_0^\infty (\mathbf{a} \exp\{-q\lambda t(\mathbf{I} - \mathbf{A})\} \mathbf{e}) \frac{q^{k-1} \exp\{-\alpha q\}}{(q+l)^\nu} dq. \quad (\text{A3})$$

It is given that  $\mathbf{I} - \mathbf{A}$  is in the Jordan normal form, i.e.,  $\mathbf{I} - \mathbf{A} = \mathbf{P} \text{diag}(\mathbf{J}_1, \mathbf{J}_2, \dots, \mathbf{J}_r) \mathbf{P}^{-1}$ , for some  $r$ , with

$$\mathbf{J}_i = \begin{pmatrix} \epsilon_i & 1 & 0 & \dots & 0 \\ 0 & \epsilon_i & 1 & \dots & 0 \\ 0 & 0 & \epsilon_i & \dots & 0 \\ \vdots & \vdots & \vdots & \ddots & \vdots \\ 0 & 0 & 0 & \dots & \epsilon_i \end{pmatrix}_{d_i \times d_i}, \quad \epsilon_i > 0, i = 1, 2, \dots, r.$$

Moreover, the dimension of  $d_i$  is equal to the multiplicity of the eigenvalue  $\epsilon_i$  that belongs to this particular Jordan block, and  $\sum_{i=1}^r d_i = d$ . Therefore,

$$\exp\{-q\lambda t(\mathbf{I} - \mathbf{A})\} = \mathbf{P} \text{diag}(\exp\{-q\lambda t \mathbf{J}_1\}, \exp\{-q\lambda t \mathbf{J}_2\}, \dots, \exp\{-q\lambda t \mathbf{J}_r\}) \mathbf{P}^{-1}, \quad (\text{A4})$$

where

$$\exp\{-q\lambda t \mathbf{J}_i\} = \begin{pmatrix} \exp\{-q\lambda t \epsilon_i\} & -q\lambda t \exp\{-q\lambda t \epsilon_i\} & \dots & \frac{(-1)^{d_i-1} (q\lambda t)^{d_i-1}}{(d_i-1)!} \exp\{-q\lambda t \epsilon_i\} \\ 0 & \exp\{-q\lambda t \epsilon_i\} & \dots & \frac{(-1)^{d_i-2} (q\lambda t)^{d_i-2}}{(d_i-2)!} \exp\{-q\lambda t \epsilon_i\} \\ 0 & 0 & \dots & \frac{(-1)^{d_i-3} (q\lambda t)^{d_i-3}}{(d_i-3)!} \exp\{-q\lambda t \epsilon_i\} \\ \vdots & \vdots & \ddots & \vdots \\ 0 & 0 & \dots & \exp\{-q\lambda t \epsilon_i\} \end{pmatrix}_{d_i \times d_i},$$

for  $i = 1, 2, \dots, r$ . Again, from (2.2), we can write

$$\int_0^\infty \exp\{-q(\lambda t \epsilon_i + \alpha)\} \frac{q^{n+k-1}}{(q+l)^\nu} dq = \frac{\Gamma_\nu(n+k, (\lambda t \epsilon_i + \alpha)l)}{(\lambda t \epsilon_i + \alpha)^{k+n-\nu}},$$

for all  $i = 1, 2, \dots, r$  and  $n \in \mathbb{N} \cup \{0\}$ . Consequently,

$$\begin{aligned}
& \int_0^\infty \exp\{-q\lambda t \mathbf{J}_i\} \exp\{-q\alpha\} \frac{q^{k-1}}{(q+l)^\nu} dq \\
&= \begin{pmatrix} \frac{\Gamma_\nu(k, (\lambda t \epsilon_i + \alpha)l)}{(\lambda t \epsilon_i + \alpha)^{k-\nu}} & \frac{-\lambda t \Gamma_\nu(k+1, (\lambda t \epsilon_i + \alpha)l)}{(\lambda t \epsilon_i + \alpha)^{k+1-\nu}} & \cdots & \frac{(-\lambda t)^{d_i-1} \Gamma_\nu(k+d_i-1, (\lambda t \epsilon_i + \alpha)l)}{(d_i-1)! (\lambda t \epsilon_i + \alpha)^{k+d_i-1-\nu}} \\ 0 & \frac{\Gamma_\nu(k, (\lambda t \epsilon_i + \alpha)l)}{(\lambda t \epsilon_i + \alpha)^{k-\nu}} & \cdots & \frac{(-\lambda t)^{d_i-2} \Gamma_\nu(k+d_i-2, (\lambda t \epsilon_i + \alpha)l)}{(d_i-2)! (\lambda t \epsilon_i + \alpha)^{k+d_i-2-\nu}} \\ \vdots & \vdots & \vdots & \vdots \\ 0 & 0 & 0 & \frac{\Gamma_\nu(k, (\lambda t \epsilon_i + \alpha)l)}{(\lambda t \epsilon_i + \alpha)^{k-\nu}} \end{pmatrix}_{d_i \times d_i} \\
&= \mathbf{D}_i(\mathbf{t}), \quad i = 1, 2, \dots, r. \tag{A5}
\end{aligned}$$

Now, by using (A4) and (A5) in (A3), we get

$$\bar{F}_L(t) = \left( \frac{\alpha^{k-\nu}}{\Gamma_\nu(k, \alpha l)} \right) \mathbf{a} \mathbf{P} \mathit{diag}(\mathbf{D}_1(\mathbf{t}), \mathbf{D}_2(\mathbf{t}), \dots, \mathbf{D}_r(\mathbf{t})) \mathbf{P}^{-1} \mathbf{e}$$

and hence, the result is proved.  $\square$

**Proof of Theorem 3.1 (ii):** By proceeding in the same line as in part (i), we get, from Remark 2.2 (b), that

$$\bar{F}_L(t) = \frac{1}{\Gamma(\beta)} \int_0^\infty (\mathbf{a} \exp\{-(qt/b)(\mathbf{I} - \mathbf{A})\} \mathbf{e}) q^{\beta-1} \exp\{-q\} dq, \tag{A6}$$

where

$$\exp\{-(qt/b)(\mathbf{I} - \mathbf{A})\} = \mathbf{P} \mathit{diag}(\exp\{-(qt/b)\mathbf{J}_1\}, \exp\{-(qt/b)\mathbf{J}_2\}, \dots, \exp\{-(qt/b)\mathbf{J}_r\}) \mathbf{P}^{-1}$$

and

$$\exp\{-(qt/b)\mathbf{J}_i\} = \begin{pmatrix} \exp\{-(qt/b)\epsilon_i\} & -(qt/b) \exp\{-(qt/b)\epsilon_i\} & \cdots & \frac{(-1)^{d_i-1} (qt/b)^{d_i-1}}{(d_i-1)!} \exp\{-(qt/b)\epsilon_i\} \\ 0 & \exp\{-(qt/b)\epsilon_i\} & \cdots & \frac{(-1)^{d_i-2} (qt/b)^{d_i-2}}{(d_i-2)!} \exp\{-(qt/b)\epsilon_i\} \\ 0 & 0 & \cdots & \frac{(-1)^{d_i-3} (qt/b)^{d_i-3}}{(d_i-3)!} \exp\{-(qt/b)\epsilon_i\} \\ \vdots & \vdots & \ddots & \vdots \\ 0 & 0 & \cdots & \exp\{-(qt/b)\epsilon_i\} \end{pmatrix}_{d_i \times d_i},$$

for  $i = 1, 2, \dots, r$ . Again, if  $\beta \in \mathbb{N}$ , then we get, from Lemma 3.3, that

$$\int_0^\infty \exp\{-(\epsilon_i(t/b) + 1)q\} q^{n+\beta-1} dq = \Gamma(\beta + n) \left( \frac{b}{b + \epsilon_i t} \right)^{\beta+n},$$

for all  $i = 1, 2, \dots, r$  and  $n \in \mathbb{N} \cup \{0\}$ . Consequently, we can write

$$\begin{aligned} & \int_0^\infty \exp\{-(qt/b)\mathbf{J}_i\} \exp\{-q\} q^{\beta-1} dq \\ &= \begin{pmatrix} \Gamma(\beta) \left(\frac{b}{t\epsilon_i+b}\right)^\beta & -\Gamma(\beta+1) \left(\frac{t}{t\epsilon_i+b}\right) \left(\frac{b}{t\epsilon_i+b}\right)^\beta & \cdots & \frac{\Gamma(\beta+d_i-1)}{(d_i-1)!} \left(\frac{-t}{t\epsilon_i+b}\right)^{d_i-1} \left(\frac{b}{t\epsilon_i+b}\right)^\beta \\ 0 & \Gamma(\beta) \left(\frac{b}{t\epsilon_i+b}\right)^\beta & \cdots & \frac{\Gamma(\beta+d_i-2)}{(d_i-2)!} \left(\frac{-t}{t\epsilon_i+b}\right)^{d_i-2} \left(\frac{b}{t\epsilon_i+b}\right)^\beta \\ \vdots & \vdots & \vdots & \vdots \\ 0 & 0 & 0 & \Gamma(\beta) \left(\frac{b}{t\epsilon_i+b}\right)^\beta \end{pmatrix}_{d_i \times d_i}, \\ &= \tilde{\mathbf{D}}_i(t), \quad i = 1, 2, \dots, r. \end{aligned}$$

On using the above equality in (A6), we get

$$\bar{F}_L(t) = \frac{1}{\Gamma(\beta)} \mathbf{P} \text{diag}(\tilde{\mathbf{D}}_1(t), \tilde{\mathbf{D}}_2(t), \dots, \tilde{\mathbf{D}}_r(t)) \mathbf{P}^{-1} \mathbf{e}$$

and hence, the result is proved for  $\beta \in \mathbb{N}$ . Now, if  $\text{Im}(\epsilon_i) = 0$ , then  $\epsilon_i$  is real and positive for all  $i = 1, 2, \dots, r$ . Then, by using part (i) and Remark 2.2 (b), we get the required result.  $\square$

**Proof of Theorem 3.2:** Let  $\mathbf{C}_1, \mathbf{C}_2, \dots, \mathbf{C}_d$  be the column vectors of the matrix  $\mathbf{P}$ , and  $\mathbf{R}_1, \mathbf{R}_2, \dots, \mathbf{R}_d$  be the row vectors of the matrix  $\mathbf{P}^{-1}$ . Then we can write

$$\mathbf{P} = \begin{pmatrix} \mathbf{C}_1 & \mathbf{C}_2 & \cdots & \mathbf{C}_d \end{pmatrix} \text{ and } \mathbf{P}^{-1} = \begin{pmatrix} \mathbf{R}_1 \\ \mathbf{R}_2 \\ \vdots \\ \mathbf{R}_d \end{pmatrix}.$$

Now,

$$\begin{aligned} \mathbf{a} \mathbf{P} \mathbf{D}(t) \mathbf{P}^{-1} \mathbf{e} &= \mathbf{a} \begin{pmatrix} \mathbf{C}_1 & \mathbf{C}_2 & \cdots & \mathbf{C}_d \end{pmatrix} \mathbf{D}(t) \begin{pmatrix} \mathbf{R}_1 \\ \mathbf{R}_2 \\ \vdots \\ \mathbf{R}_d \end{pmatrix} \mathbf{e} \\ &= \begin{pmatrix} \mathbf{a} \mathbf{C}_1 & \cdots & \mathbf{a} \mathbf{C}_d \end{pmatrix} \text{diag} \left( \frac{\Gamma_\nu(k, (\lambda t \epsilon_1 + \alpha) l)}{(\lambda t \epsilon_1 + \alpha)^{k-\nu}}, \dots, \frac{\Gamma_\nu(k, (\lambda t \epsilon_d + \alpha) l)}{(\lambda t \epsilon_d + \alpha)^{k-\nu}} \right) \begin{pmatrix} \mathbf{R}_1 \mathbf{e} \\ \vdots \\ \mathbf{R}_d \mathbf{e} \end{pmatrix} \\ &= \sum_{i=1}^d \left( \frac{\Gamma_\nu(k, (\lambda t \epsilon_i + \alpha) l)}{(\lambda t \epsilon_i + \alpha)^{k-\nu}} \right) (\mathbf{a} \mathbf{C}_i \mathbf{R}_i \mathbf{e}) = \sum_{i=1}^d c_i \left( \frac{\Gamma_\nu(k, (\lambda t \epsilon_i + \alpha) l)}{(\lambda t \epsilon_i + \alpha)^{k-\nu}} \right), \end{aligned}$$

where  $c_i = \mathbf{a} \mathbf{C}_i \mathbf{R}_i \mathbf{e}$ . Then, from Corollary 3.1, we get

$$\bar{F}_L(t) = \sum_{i=1}^d c_i \left( \frac{\alpha}{\lambda t \epsilon_i + \alpha} \right)^{k-\nu} \frac{\Gamma_\nu(k, (\lambda t \epsilon_i + \alpha) l)}{\Gamma_\nu(k, \alpha l)}.$$

Since all eigenvalues of  $\mathbf{I} - \mathbf{A}$  are real, all entries of  $\mathbf{P}$  are also real. Hence,  $c_i$  is a real constant, for all  $i = 1, 2, 3, \dots, d$ . Further,

$$\sum_{i=1}^d c_i = \sum_{i=1}^d \mathbf{a} \mathbf{C}_i \mathbf{R}_i \mathbf{e} = \mathbf{a} \begin{pmatrix} \mathbf{C}_1 & \mathbf{C}_2 & \dots & \mathbf{C}_d \end{pmatrix} \begin{pmatrix} \mathbf{R}_1 \\ \mathbf{R}_2 \\ \vdots \\ \mathbf{R}_d \end{pmatrix} \mathbf{e} = \mathbf{a} \mathbf{P} \mathbf{P}^{-1} \mathbf{e} = 1.$$

Hence, the result is proved.  $\square$

**Proof of Theorem 3.3:** From (3.1), we get

$$f_L(t) = - \left( \frac{\alpha^{k-\nu}}{\Gamma_\nu(k, \alpha l)} \right) \mathbf{a} \mathbf{P} \text{diag}(\mathbf{D}'_1(t), \mathbf{D}'_2(t), \dots, \mathbf{D}'_r(t)) \mathbf{P}^{-1} \mathbf{e},$$

where  $\mathbf{D}'_i(t) = \frac{d}{dt}(\mathbf{D}_i(t))$ , for all  $i = 1, 2, \dots, r$ . By using (2.2), we get, for every  $n \in \mathbb{N} \cup \{0\}$ ,

$$\begin{aligned} \frac{d}{dt} \left( \frac{(\lambda t)^n \Gamma_\nu(k+n, (\lambda t \epsilon_i + \alpha) l)}{(\lambda t \epsilon_i + \alpha)^{k+n-\nu}} \right) &= \frac{d}{dt} \left( (\lambda t)^n \int_0^\infty \frac{q^{k+n-1} \exp\{-(\lambda t \epsilon_i + \alpha) q\}}{(q+l)^\nu} dq \right) \\ &= -\lambda \epsilon_i (\lambda t)^n \int_0^\infty \frac{q^{k+n} \exp\{-(\lambda t \epsilon_i + \alpha) q\}}{(q+l)^\nu} dq \\ &\quad + (n\lambda) \frac{\Gamma_\nu(k+n, (\lambda t \epsilon_i + \alpha) l)}{(\lambda t \epsilon_i + \alpha)^{k+n-\nu}} (\lambda t)^{n-1} \\ &= -\lambda \epsilon_i (\lambda t)^n \frac{\Gamma_\nu(k+n+1, (\lambda t \epsilon_i + \alpha) l)}{(\lambda t \epsilon_i + \alpha)^{k+n+1-\nu}} \\ &\quad + (n\lambda) \frac{\Gamma_\nu(k+n, (\lambda t \epsilon_i + \alpha) l)}{(\lambda t \epsilon_i + \alpha)^{k+n-\nu}} (\lambda t)^{n-1}. \end{aligned}$$

Consequently,

$$\mathbf{D}'_i(t) = -\lambda(\mathbf{E}_i(t) - \mathbf{S}_i(t)),$$

where

$$\mathbf{E}_i(t) = \begin{pmatrix} \frac{\epsilon_i \Gamma_\nu(k+1, (\lambda t \epsilon_i + \alpha) l)}{(\lambda t \epsilon_i + \alpha)^{k+1-\nu}} & \frac{-\lambda t \epsilon_i \Gamma_\nu(k+2, (\lambda t \epsilon_i + \alpha) l)}{(\lambda t \epsilon_i + \alpha)^{k+2-\nu}} & \dots & \frac{(-\lambda t)^{d_i-1} \epsilon_i \Gamma_\nu(k+d_i, (\lambda t \epsilon_i + \alpha) l)}{(d_i-1)! (\lambda t \epsilon_i + \alpha)^{k+d_i-\nu}} \\ 0 & \frac{\epsilon_i \Gamma_\nu(k+1, (\lambda t \epsilon_i + \alpha) l)}{(\lambda t \epsilon_i + \alpha)^{k+1-\nu}} & \dots & \frac{(-\lambda t)^{d_i-2} \epsilon_i \Gamma_\nu(k+d_i-1, (\lambda t \epsilon_i + \alpha) l)}{(d_i-2)! (\lambda t \epsilon_i + \alpha)^{k+d_i-1-\nu}} \\ \vdots & \vdots & \vdots & \vdots \\ 0 & 0 & 0 & \frac{\epsilon_i \Gamma_\nu(k+1, (\lambda t \epsilon_i + \alpha) l)}{(\lambda t \epsilon_i + \alpha)^{k+1-\nu}} \end{pmatrix}$$

and

$$\mathbf{S}_i(t) = \begin{pmatrix} 0 & \frac{-\Gamma_\nu(k+1, (\lambda t \epsilon_i + \alpha) l)}{(\lambda t \epsilon_i + \alpha)^{k+1-\nu}} & \dots & \frac{-(-\lambda t)^{d_i-2} \Gamma_\nu(k+d_i-1, (\lambda t \epsilon_i + \alpha) l)}{(d_i-2)! (\lambda t \epsilon_i + \alpha)^{k+d_i-1-\nu}} \\ 0 & 0 & \dots & \frac{-(-\lambda t)^{d_i-3} \Gamma_\nu(k+d_i-2, (\lambda t \epsilon_i + \alpha) l)}{(d_i-3)! (\lambda t \epsilon_i + \alpha)^{k+d_i-2-\nu}} \\ \vdots & \vdots & \vdots & \vdots \\ 0 & 0 & 0 & 0 \end{pmatrix},$$

$i = 1, 2, \dots, r$ . Finally, the result follows from the fact that  $r_L(t) = f_L(t)/\bar{F}_L(t)$ . Hence, the result is proved.  $\square$

**Proof of Theorem 3.4:** From Theorem 3.2 (ii), we get

$$\begin{aligned} r_L(t) &= \beta \frac{\sum_{i=1}^d g_i \epsilon_i \left(\frac{1}{t\epsilon_i + b}\right)^{\beta+1}}{\sum_{i=1}^d g_i \left(\frac{1}{t\epsilon_i + b}\right)^{\beta}} = \beta \sum_{i=1}^d g_i \epsilon_i \left( \frac{\left(\frac{1}{t\epsilon_i + b}\right)^{\beta+1}}{\sum_{j=1}^d g_j \left(\frac{1}{t\epsilon_j + b}\right)^{\beta}} \right) \\ &= \beta \sum_{i=1}^d g_i \epsilon_i \left( \frac{1}{\sum_{j=1}^d g_j \left(\frac{t\epsilon_j + b}{t\epsilon_j + b}\right)^{\beta} (t\epsilon_i + b)} \right). \end{aligned}$$

Taking limit  $t \rightarrow \infty$  on both sides of the above expression, we get  $\lim_{t \rightarrow \infty} r_L(t) = 0$ .  $\square$

**Proof of Theorem 3.5:** We have

$$E(L - t | L > t) = \frac{1}{\bar{F}_L(t)} \int_t^{\infty} \bar{F}_L(x) dx.$$

For any  $n \in \mathbb{N} \cup \{0\}$ , we get

$$\begin{aligned} & \int_t^{\infty} \frac{(\lambda x)^n \Gamma_{\nu}(k+n, (\alpha + \lambda x \epsilon_i) l)}{(\alpha + \lambda x \epsilon_i)^{n+k-\nu}} dx \\ &= \int_t^{\infty} \int_0^{\infty} \frac{(\lambda x)^n q^{k+n-1} \exp\{-(\lambda x \epsilon_i + \alpha)q\}}{(q+l)^{\nu}} dq dx \\ &= \int_0^{\infty} \frac{\lambda^n q^{k+n-1} \exp\{-\alpha q\}}{(q+l)^{\nu}} \left( \int_t^{\infty} x^n \exp\{-\lambda x \epsilon_i q\} dx \right) dq \\ &= \frac{(\lambda t)^n}{\lambda \epsilon_i} \int_0^{\infty} \frac{q^{k+n-2} \exp\{-(\lambda t \epsilon_i + \alpha)q\}}{(q+l)^{\nu}} dq \\ & \quad + \frac{(\lambda t)^n}{\lambda \epsilon_i} \sum_{i=1}^n \frac{n(n-1) \dots (n-i+1)}{(\lambda t \epsilon_i)^i} \int_0^{\infty} \frac{q^{k+n-i-2} \exp\{-(\lambda t \epsilon_i + \alpha)q\}}{(q+l)^{\nu}} dq \\ &= \frac{(\lambda t)^n \Gamma_{\nu}(k+n-1, (\alpha + \lambda t \epsilon_i) l)}{\lambda \epsilon_i (\alpha + \lambda t \epsilon_i)^{n+k-\nu-1}} \\ & \quad + \frac{(\lambda t)^n}{\lambda \epsilon_i} \sum_{i=1}^n \frac{n(n-1) \dots (n-i+1)}{(\lambda t \epsilon_i)^i} \frac{\Gamma_{\nu}(n+k-i-1, (\alpha + \lambda t \epsilon_i) l)}{(\alpha + \lambda t \epsilon_i)^{n+k-\nu-i-1}} \\ &= \phi(n, t, \epsilon_i), \end{aligned} \tag{A7}$$

where the first equality follows from (2.2), and the third equality follows from the fact that

$$\int_t^{\infty} x^n \exp\{-\lambda x \epsilon_i q\} dx = \frac{\exp\{-t \epsilon_i q\}}{(\lambda \epsilon_i q)^{n+1}} \left[ (t \lambda \epsilon_i q)^n + \sum_{i=1}^n n(n-1) \dots (n-i+1) (t \lambda \epsilon_i q)^{n-i} \right].$$

On using (A7), we get

$$\int_t^{\infty} \bar{F}_L(x) dx = \left( \frac{\alpha^{k-\nu}}{\Gamma_{\nu}(k, \alpha l)} \right) \mathbf{aP} \left( \int_t^{\infty} \text{diag}(\mathbf{D}_1(t), \mathbf{D}_2(t), \dots, \mathbf{D}_r(t)) dx \right) \mathbf{P}^{-1} \mathbf{e}$$

$$= \left( \frac{\alpha^{k-\nu}}{\Gamma_\nu(k, \alpha l)} \right) \mathbf{a} P \text{diag}(\mathbf{R}_1(\mathbf{t}), \mathbf{R}_2(\mathbf{t}), \dots, \mathbf{R}_r(\mathbf{t})) P^{-1} \mathbf{e},$$

where

$$\begin{aligned} \mathbf{R}_i(\mathbf{t}) &= \begin{pmatrix} \int_t^\infty \left( \frac{\Gamma_\nu(k, (\lambda x \epsilon_i + \alpha) l)}{(\lambda x \epsilon_i + \alpha)^{k-\nu}} \right) dx & \int_t^\infty \left( \frac{-\lambda x \Gamma_\nu(k+1, (\lambda x \epsilon_i + \alpha) l)}{(\lambda x \epsilon_i + \alpha)^{k+1-\nu}} \right) dx & \dots & \int_t^\infty \left( \frac{(-\lambda x)^{d_i-1} \Gamma_\nu(k+d_i-1, (\lambda x \epsilon_i + \alpha) l)}{(d_i-1)! (\lambda x \epsilon_i + \alpha)^{k+d_i-1-\nu}} \right) dx \\ 0 & \int_t^\infty \left( \frac{\Gamma_\nu(k, (\lambda x \epsilon_i + \alpha) l)}{(\lambda x \epsilon_i + \alpha)^{k-\nu}} \right) dx & \dots & \int_t^\infty \left( \frac{(-\lambda x)^{d_i-2} \Gamma_\nu(k+d_i-2, (\lambda x \epsilon_i + \alpha) l)}{(d_i-2)! (\lambda x \epsilon_i + \alpha)^{k+d_i-2-\nu}} \right) dx \\ \vdots & \vdots & \vdots & \vdots \\ 0 & 0 & 0 & \int_t^\infty \left( \frac{\Gamma_\nu(k, (\lambda x \epsilon_i + \alpha) l)}{(\lambda x \epsilon_i + \alpha)^{k-\nu}} \right) dx \end{pmatrix}_{d_i \times d_i} \\ &= \begin{pmatrix} \phi(0, t, \epsilon_i) & -\phi(1, t, \epsilon_i) & \dots & \frac{(-1)^{d_i-1} \phi(d_i-1, t, \epsilon_i)}{(d_i-1)!} \\ 0 & \phi(0, t, \epsilon_i) & \dots & \frac{(-1)^{d_i-2} \phi(d_i-2, t, \epsilon_i)}{(d_i-2)!} \\ \vdots & \vdots & \vdots & \vdots \\ 0 & 0 & 0 & \phi(0, t, \epsilon_i) \end{pmatrix}_{d_i \times d_i}, \end{aligned}$$

$i = 1, 2, \dots, r$ . Hence, the result is proved.  $\square$

**Proof of Theorem 3.6:** We have

$$E(L) = E(E(L|Q)),$$

where  $Q$  is a mixing random variable of the HPGGP with parameter set  $\{\lambda, \nu, k, \alpha, l\}$ ,  $k > 1$ . Now, for given  $Q = q$ ,  $X_i$ 's are i.i.d. random variables and follow the exponential distribution with parameter  $q\lambda$ . Then

$$E(L|Q = q) = E\left(\sum_{i=1}^M X_i | Q = q\right) = E(M)E(X_1|Q = q) = (\mathbf{a}(\mathbf{I} - \mathbf{A})^{-1} \mathbf{e}) \frac{1}{q\lambda}$$

and consequently,

$$\begin{aligned} E(L) &= \frac{(\mathbf{a}(\mathbf{I} - \mathbf{A})^{-1} \mathbf{e})}{\lambda} E\left(\frac{1}{Q}\right) \\ &= \frac{(\mathbf{a}(\mathbf{I} - \mathbf{A})^{-1} \mathbf{e})}{\lambda} \int_0^\infty \frac{\alpha^{k-\nu}}{\Gamma_\nu(k, \alpha l)} \frac{q^{k-2} \exp\{-\alpha q\}}{(q+l)^\nu} dq \\ &= \frac{\alpha(\mathbf{a}(\mathbf{I} - \mathbf{A})^{-1} \mathbf{e})}{\lambda} \frac{\Gamma_\nu(k-1, \alpha l)}{\Gamma_\nu(k, \alpha l)}. \end{aligned}$$

Hence, the result is proved.  $\square$

**Proof of Theorem 3.7:** Let  $\boldsymbol{\gamma}_i = (\theta_1^{(i)}, \theta_2^{(i)}, \dots, \theta_d^{(i)})$ ,  $i = 1, 2$ . Then from Theorem 3.2 ( $i$ ), we have

$$\bar{F}_{L_1}(t) = \left( \frac{\alpha^{k-\nu}}{\Gamma_\nu(k, \alpha l)} \right) \sum_{j=1}^d \frac{\theta_j^{(1)} \Gamma_\nu(k, (\lambda t \epsilon_j^{(1)} + \alpha) l)}{(\lambda t \epsilon_j^{(1)} + \alpha)^{k-\nu}}$$

and

$$\bar{F}_{L_2}(t) = \left( \frac{\alpha^{k-\nu}}{\Gamma_\nu(k, \alpha l)} \right) \sum_{i=1}^d \frac{\theta_j^{(2)} \Gamma_\nu(k, (\lambda t \epsilon_j^{(2)} + \alpha) l)}{(\lambda t \epsilon_j^{(2)} + \alpha)^{k-\nu}}.$$

Clearly, both  $L_1$  and  $L_2$  are mixtures of  $d$  random variables with the survival functions given by

$$\begin{aligned} \bar{F}_j^{(i)}(t) &= \left( \frac{\alpha^{k-\nu}}{\Gamma_\nu(k, \alpha l)} \right) \frac{\Gamma_\nu(k, (\lambda t \epsilon_j^{(i)} + \alpha) l)}{(\lambda t \epsilon_j^{(i)} + \alpha)^{k-\nu}} \\ &= \left( \frac{\alpha^{k-\nu}}{\Gamma_\nu(k, \alpha l)} \right) \int_0^\infty \frac{q^{k-1} \exp\{-(\lambda t \epsilon_j^{(i)} + \alpha) q\}}{(q + l)^\nu} dq, \quad j = 1, 2, \dots, d, \end{aligned}$$

where the second equality follows from (2.2). Since  $\epsilon_1^{(i)} \leq \epsilon_2^{(i)} \leq \dots \leq \epsilon_d^{(i)}$ , we get  $\bar{F}_1^{(i)}(t) \geq \bar{F}_2^{(i)}(t) \dots \geq \bar{F}_d^{(i)}(t)$ ,  $i = 1, 2$ . Again,  $\epsilon_j^{(1)} \geq \epsilon_j^{(2)}$  implies  $\bar{F}_j^{(1)}(t) \leq \bar{F}_j^{(2)}(t)$ , for all  $j = 1, 2, \dots, d$ . Moreover, we have that  $\gamma_1 \geq_{st} \gamma_2$ . Then the result follows from Theorem 4.6 of Shojaae et al. [30].  $\square$

**Proof of Theorem 3.8:** Now, for  $j = 1, 2$ , we have

$$\bar{F}_{L_j}(t) = P \left( \sum_{i=1}^M X_i^{(j)} > t \right) = \int_0^\infty P \left( \sum_{i=1}^M X_i^{(j)} > t | Q_j = q_j \right) f_{Q_j}(q_j) dq_j, \quad (\text{A8})$$

where  $Q_j$  is the mixing random variable of the HPGGP with parameter set  $\{\lambda_j, \nu_j, k_j, \alpha_j, l_j\}$ ,  $j = 1, 2$ . Note that, for given  $Q_j = q_j$ , the HPGGP with parameter set  $\{\lambda_j, \nu_j, k_j, \alpha_j, l_j\}$  is the same as the HPP with intensity  $q_j \lambda_j$ ,  $j = 1, 2$ . Then, from Corollary 3.1, we get

$$P \left( \sum_{i=1}^M X_i^{(j)} > t | Q_j = q_j \right) = \mathbf{a} \exp\{-q_j \lambda_j t (\mathbf{I} - \mathbf{A})\} \mathbf{e}.$$

By using the above equality in (A8), we get

$$\bar{F}_{L_j}(t) = E(\mathbf{a} \exp\{-Q_j \lambda_j t (\mathbf{I} - \mathbf{A})\} \mathbf{e}), \quad j = 1, 2.$$

Again, note that  $\mathbf{a} \exp\{-x(\mathbf{I} - \mathbf{A})\} \mathbf{e}$  is decreasing in  $x > 0$  and hence, for  $\lambda_1 \leq \lambda_2$ , we get

$$\begin{aligned} \bar{F}_{L_1}(t) &= E(\mathbf{a} \exp\{-Q_1 \lambda_1 t (\mathbf{I} - \mathbf{A})\} \mathbf{e}) \\ &\geq E(\mathbf{a} \exp\{-Q_1 \lambda_2 t (\mathbf{I} - \mathbf{A})\} \mathbf{e}). \end{aligned} \quad (\text{A9})$$

Now, if  $Q_2 \geq_{st} Q_1$  holds then  $\mathbf{a} \exp\{-Q_1 \lambda_2 t (\mathbf{I} - \mathbf{A})\} \mathbf{e} \geq_{st} \mathbf{a} \exp\{-Q_2 \lambda_2 t (\mathbf{I} - \mathbf{A})\} \mathbf{e}$  (see Theorem 1.A.3 (a) in Shaked and Shanthikumar [27]) and hence,  $E(\mathbf{a} \exp\{-Q_1 \lambda_2 t (\mathbf{I} - \mathbf{A})\} \mathbf{e}) \geq \mathbf{a} \exp\{-Q_2 \lambda_2 t (\mathbf{I} - \mathbf{A})\} \mathbf{e}$ . By combining this and (A9), we get

$$\bar{F}_{L_1}(t) \geq E(\mathbf{a} \exp\{-Q_2 \lambda_2 t (\mathbf{I} - \mathbf{A})\} \mathbf{e}) = \bar{F}_{L_2}(t)$$

provided that  $Q_2 \geq_{st} Q_1$  holds. Again,  $Q_2 \geq_{st} Q_1$  follows provided that one of the following conditions holds (see the proof of Proposition 5 in Cha and Mercier [7]).



- $\alpha_1 = \alpha_2$ ,  $k_2 \geq k_1$  and  $k_2 - k_1 \geq \nu_2 - \nu_1$ ;
- $\alpha_2 < \alpha_1$  and  $(\alpha_1 - \alpha_2 + k_2 - k_1 + \nu_1 - \nu_2)^2 - 4(\alpha_1 - \alpha_2)(k_2 - k_1) \leq 0$ ;
- $\alpha_2 < \alpha_1$  and  $\alpha_1 - \alpha_2 + k_2 - k_1 + \nu_1 - \nu_2 \geq 0$

Note that these conditions are given in the assumption and hence, the result is proved.  $\square$
